# Supplementary material
Source: PubMed Central journal article supplement (PMC7755711)

Supplementary Figure 11

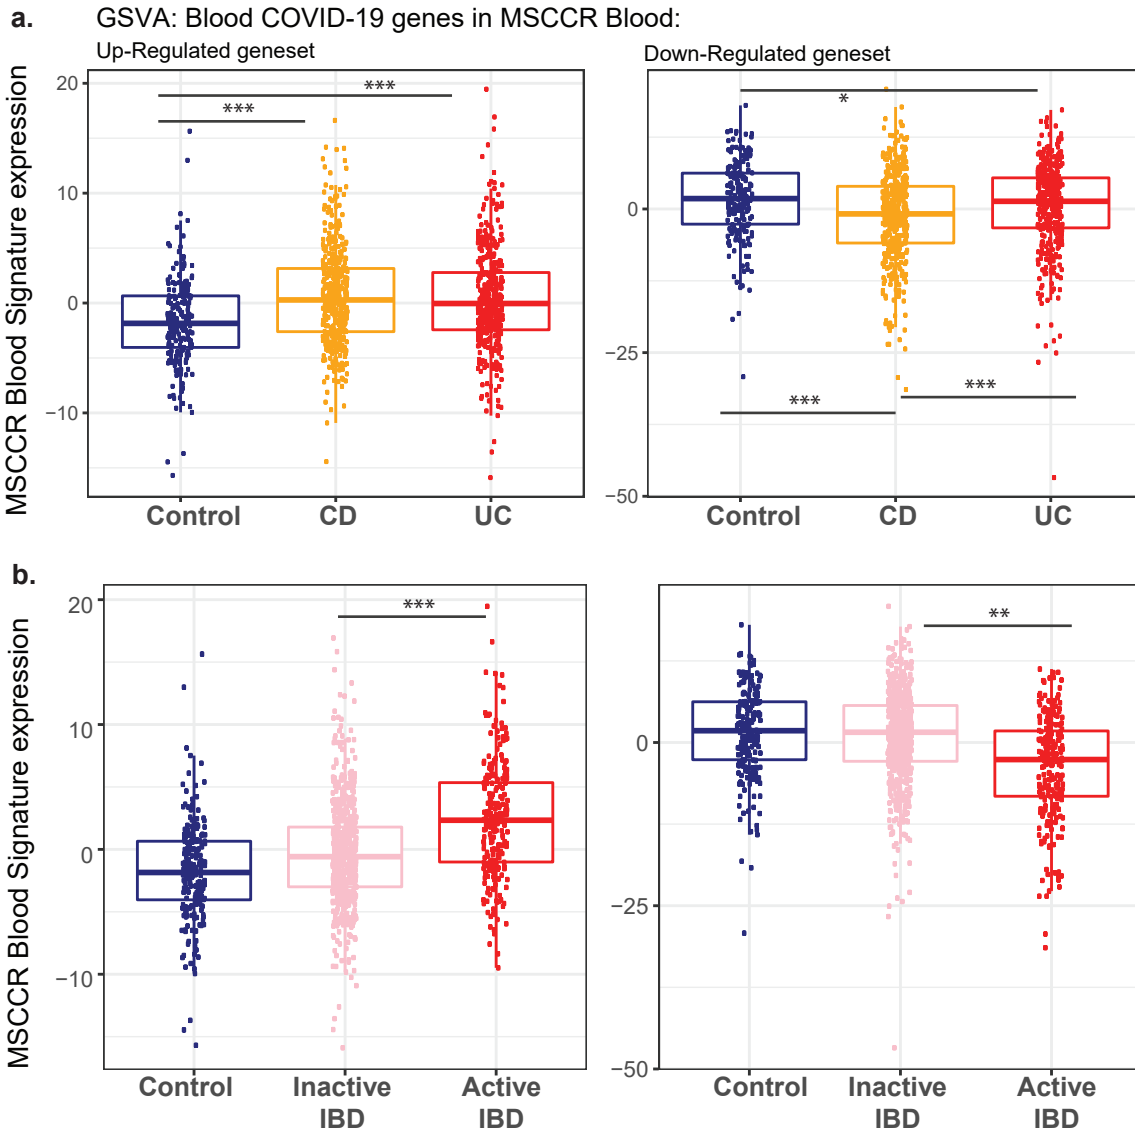

Supplement: NIHMS1632886-supplement-4.pdf [file NIHMS1632886-supplement-4.pdf]
