# Supplementary material
Source: PubMed Central journal article supplement (PMC7755711)
Supplement: NIHMS1632886-supplement-9.pdf [file NIHMS1632886-supplement-9.pdf]

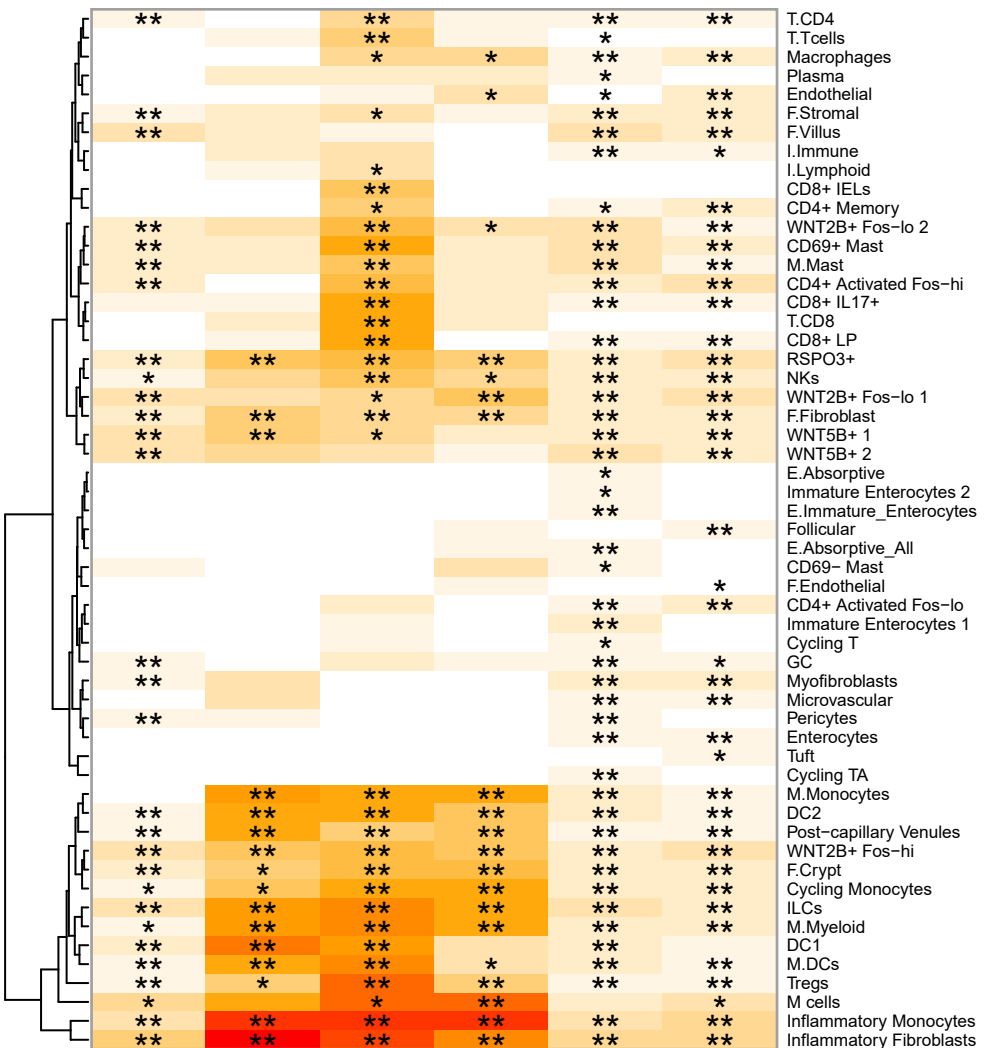

Ileum CD NHBE-COVID-19 nplus1  
 Ileum CD  
 Pan-colonic CD  
 Pan-colonic UC  
 Pan-colonic CD NHBE-COVID-19 nplus 1  
 Pan-colonic UC NHBE-COVID-19 nplus1

intersects between Subnetworks from IBD-Inf & NHBE-COVID-19

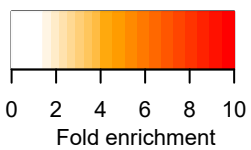

Adj P value \* <math>p < 0.05</math>; \*\* <math>p < 0.01</math>; \*\*\* <math>p < 0.001</math>
