# Supplementary material
Source: PubMed Central journal article supplement (PMC7755711)
Supplement: NIHMS1632886-supplement-10.pdf [file NIHMS1632886-supplement-10.pdf]

# Supplementary Figure 13

a. hSIO\_DIF\_COVID-19 Upregulated genes (adj p <0.1) (GSVA)

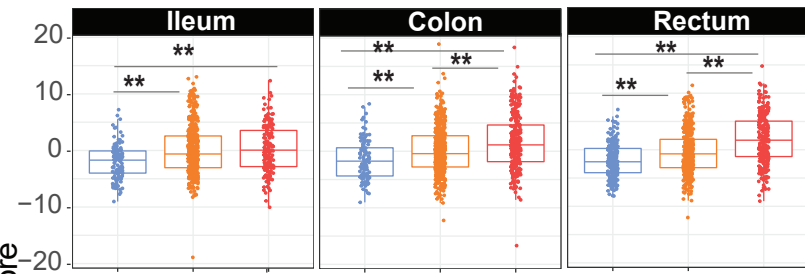

b. hSIO\_EXP\_COVID-UPregulated genes (adj p <0.1) (GSVA)

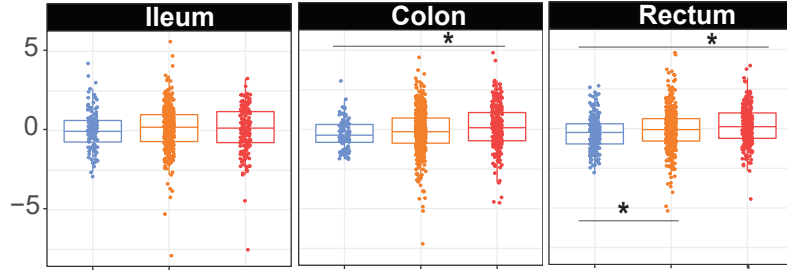

hSIO\_DIF\_COVID-Downregulated genes (adj p <0.10) (GSVA)

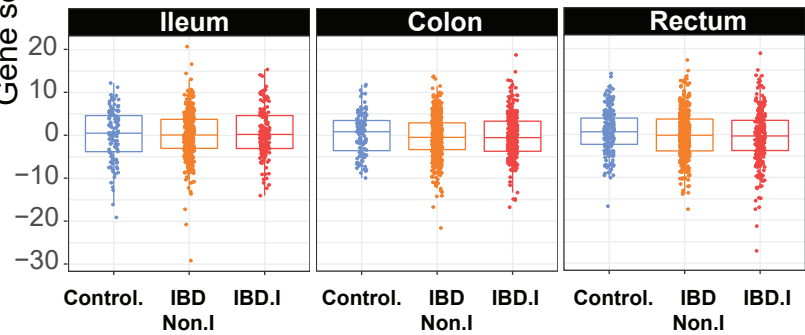

hSIO\_EXP\_COVID-Downregulated genes (adj p <0.10) (GSVA)

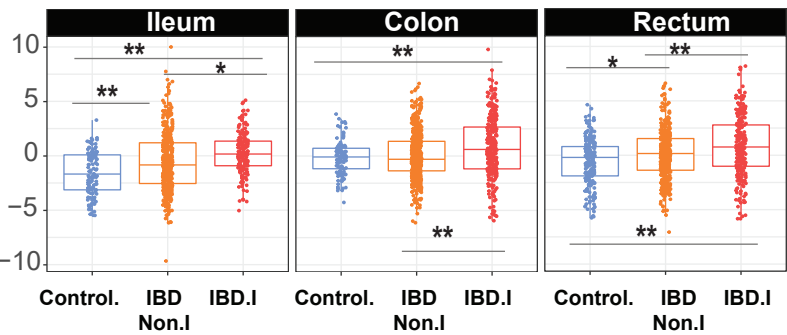

Legend: Controls IBD: non-inflamed IBD: inflamed \*p<0.05 \*\* p<0.001

c.

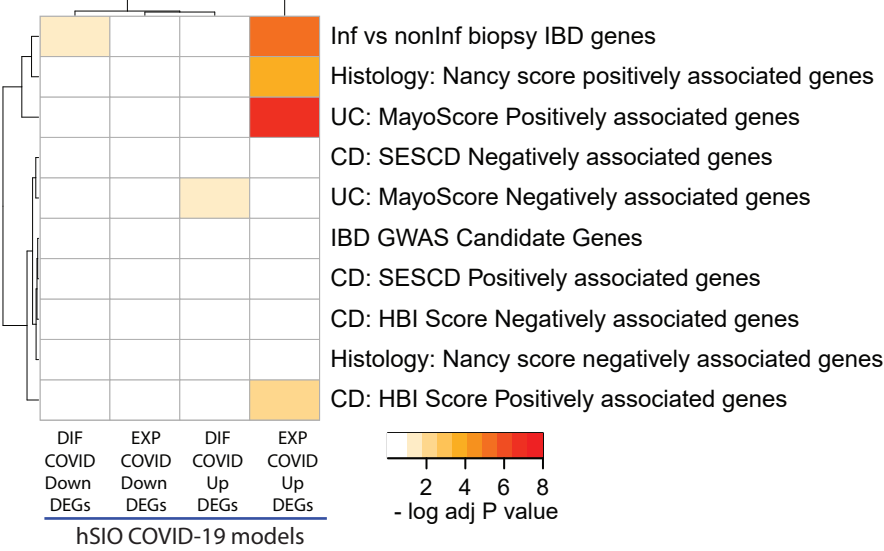

d.

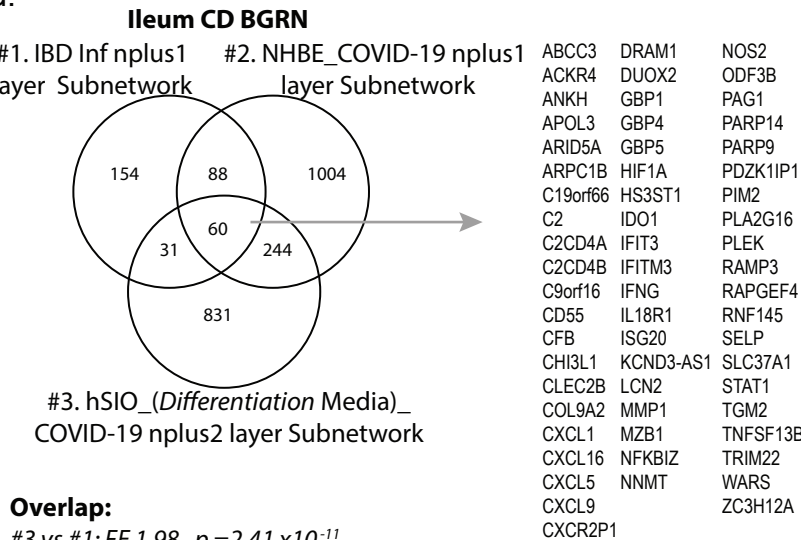

**Overlap:**  
 #3 vs #1: FE 1.98,  $p=2.41 \times 10^{-11}$   
 #2 vs #3: FE 1.6,  $p=1.65 \times 10^{-19}$   
 #1/2 intersect (148 genes) vs #3/#1 intersect (91 genes):  
 FE 37.6,  $p=2.3 \times 10^{-87}$

e.

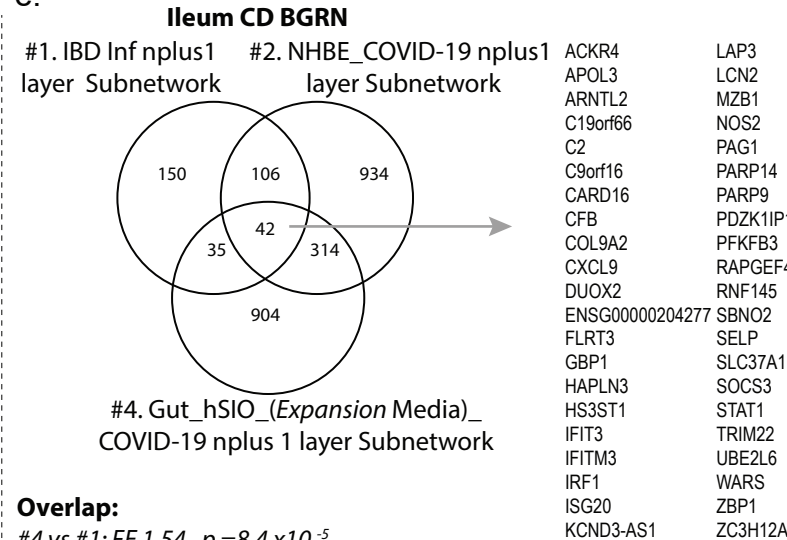

**Overlap:**  
 #4 vs #1: FE 1.54,  $p=8.4 \times 10^{-5}$   
 #2 vs #4: FE 1.67,  $p=5.8 \times 10^{-28}$   
 #1/#2 intersect (148 genes) vs #4/#1 intersect (77 genes):  
 FE 31.0,  $p=3.67 \times 10^{-55}$
